# Supplementary material for: Activation of a Subset of Evolutionarily Young Transposable Elements and Innate Immunity Are Linked to Clinical Responses to 5-Azacytidine
Source: Oxford University Press journal article supplement (doi:10.1158/0008-5472.can-19-1696), 2020-04-03
Supplement: 00085472can191696-sup-223228_4_supp_6137078_q6pv89.docx [file 00085472can191696-sup-223228_4_supp_6137078_q6pv89.docx]

**Supplementary Information**

**Supplementary Figure S1. Origin of samples from the three cohorts of hematological cancer patients.**

**Supplementary Figure S2. Genes related to immune response and leukocyte activation were significantly upregulated in responders but not in non-responders following AZA treatment.**

**A,** The expression changes of coding genes based on 91 RNA-seq data samples from 26 patients of the Nordic and the Australian cohorts at multiple time points before, during, and after AZA treatment. Top panel: 385 genes were upregulated in malignant cells of the 9 non-responders. Middle panel: 1,117 genes were upregulated in malignant cells of the 17 responders. Bottom panel: 3,164 genes were upregulated in T cells of the 5 responders. The median fold change (FC) is calculated by using posttreatment compared to pretreatment median RPKM values in the non-responders or responders (highest value from the multiple time points is used). **B,** Gene ontology analysis of biological processes enriched in the upregulated genes. The binomial tests were applied using Gene Ontology database. The y-axis indicates Bonferroni corrected –log2 *P*-values; the x-axis indicates each Gene Ontology term. The graphs show the Gene Ontology terms represented by the genes of the adjacent heatmaps in Figure A. Colored bars are identified in the key. The names and accession numbers of the observed GO terms are shown in Supplementary Table S4.

**Supplementary Figure S3. Reactivation of tumor suppressor genes (*CDKN2A* and *CDKN2B*).**

**A,** Expression changes (highest value at any of the multiple time points) of 38 tumor suppressor genes including CDKN2A and CDKN2B in 17 responders between pretreatment and posttreatment. Black dashed lines are the threshold of the two-tailed Wilcoxon Signed-Rank Test Holm-adjusted *P*-value < 0.05 (horizontal) or FC > 2 (vertical). **B,** Expression of *CDKN2A* and *CDKN2B* based on RNA-seq data. *P*-values were calculated using the two-tailed Wilcoxon Signed-Rank Test for comparisons between the responders and non-responders. (**); *P* < 0.01, (n.s.); not significant.

**Supplementary Figure S4. The type I IFN signaling pathway genes show significantly greater fold changes following AZA treatment in responders relative to non-responders.**

Expression changes (fold change) of the genes involved in type I IFN signaling pathway (GO:0060337, *n* = 64) based on RNA-seq data. **A,** CD14+ cells (monocytes) from the Nordic CMML cohort. **B,** bulk mononuclear or myeloid mononuclear cells from the Nordic MDS cohort. **C,** mononuclear cells from the Nordic AML patient. **D,** CD34+ cells (HSPCs) from the Nordic MDS cohort. **E,** CD34+ cells (HSPCs) from the Australian cohort. **F,** CD14+ cells from the Nordic CMML cohort at C1D5. **G,** bulk mononuclear or myeloid mononuclear cells from the Nordic MDS cohort at C3D1. **H,** Nordic cohort with high mapping rates (> 90%). The columns of the heatmaps represent the time points of sample collection during or after AZA treatment in each patient; for example, “C1D5” means “cycle 1, day 5” and “C2D1” means “day one of cycle 2 immediately before the second AZA treatment is given”. Dot plots represent the medians of fold change of these genes in non-responders and responders in each cell type. The gray lines connect the same genes between non-responders and responders. *P*-values were calculated using a two-tailed Wilcoxon Signed-Rank Test between the two groups of non-responders and responders: (***); *P* < 0.001, (*); *P* < 0.05.

**Supplementary Figure S5. Selected ERV families show responder-specific induction upon AZA treatment.**

**A,** Bioinformatic workflow to identify AZA-induced LTRs in 91 RNA-seq data samples from 26 patients of the Nordic and Australian cohorts. The 20,905 individual intergenic LTRs were expressed at more than 20 reads per 50 million mapped reads in at least one of the data samples from malignant cells. **B,** Expression changes of commonly upregulated individual LTRs in at least 10 of the 26 patients. **C,** The fraction of intergenic LTR transcripts showed no significant difference between non-responders and responders before and after AZA treatment (highest value at any of the multiple time points). The y-axis represents the fraction of reads mapped to the 450,107 intergenic LTRs to total mapped reads. Gray lines connect the values before and after treatment in an individual patient. *P*-values were calculated using two-tailed Mann-Whitney *U*-test for comparisons between the two groups: (n.s.); not significant. **D,** Expression changes of the responder-specific upregulated LTR families. The 19 LTR families were selected from 368 LTR families (FC ≥ 2 and at least five individual LTR copies are contained in these families). **E,** LTR12Cand LTR7 are selected from Figure D.

**Supplementary Figure S6. Selected LINE families show responder-specific induction upon AZA treatment.**

**A,** Bioinformatic workflow used to identify AZA-induced LINEs in 91 RNA-seq data samples. A total of 50,433 individual intergenic LINEs were expressed at more than 20 reads per 50 million mapped reads in at least one of the data samples from malignant cells. **B,** The expression changes of commonly upregulated individual LINEs in at least 10 in the 26 patients. **C,** Fraction of reads mapped to the 896,228 intergenic LINEs. Gray lines connect the values before and after treatment in an individual patient. *P*-values were calculated using two-tailed Mann-Whitney *U*-test for comparisons between the two groups: (n.s.); not significant. **D,** The expression changes of responder-specific upregulated LINE families. The 13 LINE families were selected from 145 LINE families (FC ≥ 2 and at least five individual LINE copies are contained in the families).

**Supplementary Figure S7. Selected SINE families show responder-specific induction upon AZA treatment.**

**A,** Bioinformatic workflow used to identify AZA-induced SINEs in 91 RNA-seq data samples. A total of 53,552 individual intergenic SINEs were expressed at more than 20 reads per 50 million mapped reads in at least one of the data samples from malignant cells. **B,** The expression changes of commonly upregulated individual SINEs in at least 10 of the 26 patients. **C,** Fraction of reads mapped to the 928,934 intergenic SINEs. Gray lines connect the values before and after treatment in an individual patient. *P*-values were calculated using two-tailed Mann-Whitney *U*-test for comparisons between the two groups: (n.s.); not significant. **D,** Expression changes of responder-specific upregulated SINE families. The 4 SINE families were selected from 38 SINE families (FC ≥ 2 and at least five individual SINE copies are contained in the families).

**Supplementary Figure S8. Specific evolutionarily young transposable elements show responder-specific induction by AZA treatment (related to Supplementary Fig. S4F and S4G)**

**A,** The distribution of divergence levels in individual intergenic LTRs that were upregulated in responders (median FC ≥ 2) but not in non-responders (median FC < 2). The RNA-seq data in CD14+ cells from Nordic CMML patients at C1D5 and mononuclear cells from Nordic MDS patients at C3D1 were used. “Remainder” refers to LTRs that were not responder-specific upregulated by treatment. Each box represents the data between the 25th and 75th quartiles. The whiskers are drawn down to the 10th percentile and up to the 90th percentile. The difference between the two groups is significant. *P*-values were calculated using two-tailed Mann-Whitney *U* test: (***); *P* < 0.001. **B,** The distribution of divergence levels in individual intergenic LINEs that were upregulated in responders but not in non-responders (*P* < 0.001). **C,** The distribution of divergence levels in individual intergenic SINEs that were upregulated in responders but not in non-responders (*P* < 0.001).

**Supplementary Figure S9. Reactivation of *CDKN2A* and *CDKN2B* in pediatric patients (related to Supplementary Fig. S3B).**

Relative expression levels of *CDKN2A* and *CDKN2B* by RT-qPCR in pediatric AML and ALL patients (*n* = 14). Black lines represent median values. The highest values obtained at any of the multiple time points are shown as the posttreatment value. *P*-values were calculated using the two-tailed Wilcoxon Signed-Rank Test for comparisons between the two groups. (**); *P* < 0.01, (n.s.); not significant.

**Supplementary Figure S10. Expression changes of the innate immune genes, LTRs, and tumor suppressor genes in AML pediatric patients (related to Fig. 4 and Supplementary Fig. S9).**

**A,** Relative expression of the immune response– and leukocyte activation–related genes in only AML patients (*n* = 11; three ALL patients in Fig. 4A were removed). **B,** Relative expression of LTRs in only AML patients (*n* = 11; three ALL patients in Fig. 4B were removed). **C,** Relative expression of CDKN2A and CDKN2B in only AML patients (*n* = 11; three ALL patients in Supplementary Fig. S9 were removed). Black lines represent median values. The highest values at any of the multiple time points are shown in posttreatment data. *P*-values were calculated using the two-tailed Wilcoxon Signed-Rank Test for comparisons between the two groups. (*); *P* < 0.05, (**); *P* < 0.01, (n.s.); not significant.
